# Supplementary material for: Influence of fast-track programs on patient-reported outcomes in total hip and knee replacement (THR/TKR) at Swedish hospitals 2011–2015: an observational study including 51,169 THR and 8,393 TKR operations
Source: PubMed Central journal article supplement (PMC8023888; doi:10.1080/17453674.2020.1733375), 2020-02-28
Supplement: IORT_A_1733375_SM7102.pdf [file IORT_A_1733375_SM7102.pdf]

## Supplementary data

Table 3. EQ-5D-3L data in THR patients with complete responses preoperatively and 1 year postoperatively. Values are n (%)

| Respon             | Preoperatively               |                          |                      | 1 year postoperatively       |                          |                      |
|--------------------|------------------------------|--------------------------|----------------------|------------------------------|--------------------------|----------------------|
|                    | Not fast-track<br>n = 25,585 | Fast-track<br>n = 35,986 | Unknown<br>n = 6,688 | Not fast-track<br>n = 25,585 | Fast-track<br>n = 35,986 | Unknown<br>n = 6,688 |
| PROM responses     | 19,237 (75)                  | 27,615 (77)              | 4,317 (65)           | 19,237 (75)                  | 27,615 (77)              | 4,317 (65)           |
| Mobility           |                              |                          |                      |                              |                          |                      |
| No problems        | 1,569 (8.2)                  | 2,296 (8.3)              | 376 (8.7)            | 11,682 (61)                  | 17,066 (62)              | 2,804 (65)           |
| Some problems      | 17,625 (92)                  | 25,252 (91)              | 3,928 (91)           | 7,530 (39)                   | 10,520 (38)              | 1,506 (35)           |
| Extreme problems   | 43 (0.2)                     | 67 (0.2)                 | 13 (0.3)             | 25 (0.1)                     | 29 (0.1)                 | 7 (0.2)              |
| Self-care          |                              |                          |                      |                              |                          |                      |
| No problems        | 15,047 (78)                  | 21,550 (78)              | 3,408 (79)           | 17,804 (93)                  | 25,920 (94)              | 4,031 (93)           |
| Some problems      | 4,006 (21)                   | 5,849 (21)               | 882 (20)             | 1,336 (6.9)                  | 1,574 (5.7)              | 263 (6.1)            |
| Extreme problems   | 184 (1.0)                    | 216 (0.8)                | 27 (0.6)             | 97 (0.5)                     | 121 (0.4)                | 23 (0.5)             |
| Usual activities   |                              |                          |                      |                              |                          |                      |
| No problems        | 7,730 (40)                   | 11,088 (40)              | 1,654 (38)           | 14,891 (77)                  | 21,960 (80)              | 3,424 (79)           |
| Some problems      | 9,707 (51)                   | 14,010 (51)              | 2,273 (53)           | 3,965 (21)                   | 5,188 (19)               | 826 (19)             |
| Extreme problems   | 1,800 (9.4)                  | 2,517 (9.1)              | 390 (9.0)            | 381 (2.0)                    | 467 (1.7)                | 67 (1.6)             |
| Pain/Discomfort    |                              |                          |                      |                              |                          |                      |
| No problems        | 279 (1.5)                    | 397 (1.4)                | 71 (1.6)             | 8564 (45)                    | 12752 (46)               | 2172 (50)            |
| Some problems      | 11,093 (58)                  | 15,839 (57)              | 2,538 (59)           | 9,750 (51)                   | 13,677 (50)              | 1,948 (45)           |
| Extreme problems   | 7,865 (41)                   | 11,379 (41)              | 1,708 (40)           | 923 (4.8)                    | 1,186 (4.3)              | 197 (4.6)            |
| Anxiety/Depression |                              |                          |                      |                              |                          |                      |
| No problems        | 11,466 (60)                  | 16,412 (59)              | 2,747 (64)           | 15,039 (78)                  | 22,022 (80)              | 3,506 (81)           |
| Some problems      | 7,197 (37)                   | 10,316 (37)              | 1,444 (33)           | 3,903 (20)                   | 5,227 (19)               | 747 (17)             |
| Extreme problems   | 574 (3.0)                    | 887 (3.2)                | 126 (2.9)            | 295 (1.5)                    | 366 (1.3)                | 64 (1.5)             |

7

Table 7. EQ-5D3L data in TKR patients with complete responses preoperatively and 1 year postoperatively. Values are n (%)

| Respon             | Preoperatively              |                         | 1 year postoperatively      |                         |
|--------------------|-----------------------------|-------------------------|-----------------------------|-------------------------|
|                    | Not fast-track<br>n = 4,528 | Fast-track<br>n = 7,366 | Not fast-track<br>n = 4,528 | Fast-track<br>n = 7,366 |
| PROM responses     | 3,450 (76)                  | 4,943 (67)              | 3,450 (76)                  | 4,943 (67)              |
| Mobility           |                             |                         |                             |                         |
| No problems        | 468 (14)                    | 581 (12)                | 2,135 (62)                  | 3,198 (65)              |
| Some problems      | 2,965 (86)                  | 4,359 (88)              | 1,309 (38)                  | 1,741 (35)              |
| Extreme problems   | 17 (0.5)                    | 3 (0.1)                 | 6 (0.2)                     | 4 (0.1)                 |
| Self-care          |                             |                         |                             |                         |
| No problems        | 3,229 (94)                  | 4,694 (95)              | 3,277 (95)                  | 4,741 (96)              |
| Some problems      | 190 (5.5)                   | 210 (4.2)               | 157 (4.6)                   | 171 (3.5)               |
| Extreme problems   | 31 (0.9)                    | 39 (0.8)                | 16 (0.5)                    | 31 (0.6)                |
| Usual activities   |                             |                         |                             |                         |
| No problems        | 2,071 (60)                  | 2,653 (54)              | 2,658 (77)                  | 3,875 (78)              |
| Some problems      | 1,217 (35)                  | 2,044 (41)              | 736 (21)                    | 985 (20)                |
| Extreme problems   | 162 (4.7)                   | 246 (5.0)               | 56 (1.6)                    | 83 (1.7)                |
| Pain/Discomfort    |                             |                         |                             |                         |
| No problems        | 74 (2.1)                    | 78 (1.6)                | 1,171 (34)                  | 1,847 (37)              |
| Some problems      | 2,222 (64)                  | 2,964 (60)              | 2,092 (61)                  | 2,837 (57)              |
| Extreme problems   | 1,154 (33)                  | 1,901 (39)              | 187 (5.4)                   | 259 (5.2)               |
| Anxiety/Depression |                             |                         |                             |                         |
| No problems        | 2,278 (66)                  | 3,356 (68)              | 2,643 (77)                  | 3,961 (80)              |
| Some problems      | 1,082 (31)                  | 1,492 (30)              | 728 (21)                    | 913 (19)                |
| Extreme problems   | 90 (2.6)                    | 95 (1.9)                | 79 (2.3)                    | 69 (1.4)                |

**Table 9. Mean values (SD) and change (Delta (SD)) in KOOS data in TKR patients with complete responses preoperatively and 1 year postoperatively**

| Responses      | Preoperatively              |                         | 1 year postoperatively      |                         | Delta          |            |
|----------------|-----------------------------|-------------------------|-----------------------------|-------------------------|----------------|------------|
|                | Not fast-track<br>n = 4,528 | Fast-track<br>n = 7,366 | Not fast-track<br>n = 4,528 | Fast-track<br>n = 7,366 | Not fast-track | Fast-track |
| KOOS subscale  | 3,450 (76)                  | 4,652 (63)              | 3,450 (76)                  | 4,652 (63)              |                |            |
| Symptoms       | 49 (18)                     | 46 (18)                 | 76 (17)                     | 77 (17)                 | 27 (21)        | 31 (21)    |
| Pain           | 41 (15)                     | 40 (15)                 | 79 (19)                     | 81 (19)                 | 38 (21)        | 41 (21)    |
| Daily activity | 47 (16)                     | 45 (16)                 | 78 (19)                     | 79 (19)                 | 31 (20)        | 34 (20)    |
| Sports/rec.    | 12 (14)                     | 11 (14)                 | 36 (27)                     | 38 (27)                 | 24 (27)        | 27 (27)    |
| QoL            | 24 (14)                     | 22 (14)                 | 64 (24)                     | 65 (24)                 | 40 (25)        | 42 (25)    |

**Table 10. Multivariable regression analysis of EQ5D Index 1 year after TKR with 95% confidence interval (CI) with adjustments for Pre EQ index, year of operation, demographic and procedure-specific variables**

|                   | Estimate (CI)             |
|-------------------|---------------------------|
| Not fast-track    | ref.                      |
| Fast-track        | 0.010 (0.005 to 0.014)    |
| Pre EQ index      | 0.292 (0.271 to 0.312)    |
| Age               | 0.000 (0.000 to 0.000)    |
| Female sex        | -0.004 (-0.009 to 0.000)  |
| BMI               | -0.002 (-0.002 to -0.001) |
| Charnley B        | -0.007 (-0.012 to -0.001) |
| Charnley C        | -0.048 (-0.054 to -0.042) |
| Year of operation | 0.002 (0.000 to 0.004)    |
| Anesthesia        |                           |
| general           | -0.009 (-0.014 to -0.004) |
| other             | 0.030 (0.013 to 0.047)    |
| No tourniquet     | 0.002 (-0.002 to 0.007)   |
| Operation time    |                           |
| 30-60 min         | -0.002 (-0.007 to 0.003)  |
| >90 min           | -0.007 (-0.014 to -0.001) |

**Table 11. Multivariable regression analysis of EQ5D Index 1 year after THR with 95% confidence interval (CI) with adjustments for age, sex, BMI, Charnley class, preop EQ VAS, year of operation, implant fixation method and surgical approach**

|                    | Estimate (CI)             |
|--------------------|---------------------------|
| Not fast-track     | ref.                      |
| Fast-track         | 0.006 (0.004 to 0.008)    |
| Unknown            | 0.004 (0.001 to 0.008)    |
| Pre EQ Index       | 0.238 (0.230 to 0.246)    |
| Age                | -0.001 (-0.001 to -0.001) |
| Female sex         | -0.011 (-0.013 to -0.010) |
| BMI                | -0.002 (-0.002 to -0.002) |
| Charnley B         | -0.025 (-0.027 to -0.022) |
| Charnley C         | -0.051 (-0.053 to -0.049) |
| Year of operation  | 0.000 (0.000 to 0.001)    |
| Hybrid             | 0.004 (-0.002 to 0.009)   |
| Uncemented         | 0.005 (0.002 to 0.007)    |
| Reversed hybrid    | 0.002 (0.000 to 0.005)    |
| Resurfacing        | 0.006 (-0.007 to 0.018)   |
| Incision other     | 0.009 (-0.002 to 0.019)   |
| Incision posterior | 0.015 (0.013 to 0.017)    |
